# Supplementary material
Source: PubMed Central journal article supplement (PMC7983497)
Supplement: sj-pdf-1-jcb-10.1177_0271678X20935274.pdf [file sj-pdf-1-jcb-10.1177_0271678X20935274.pdf]

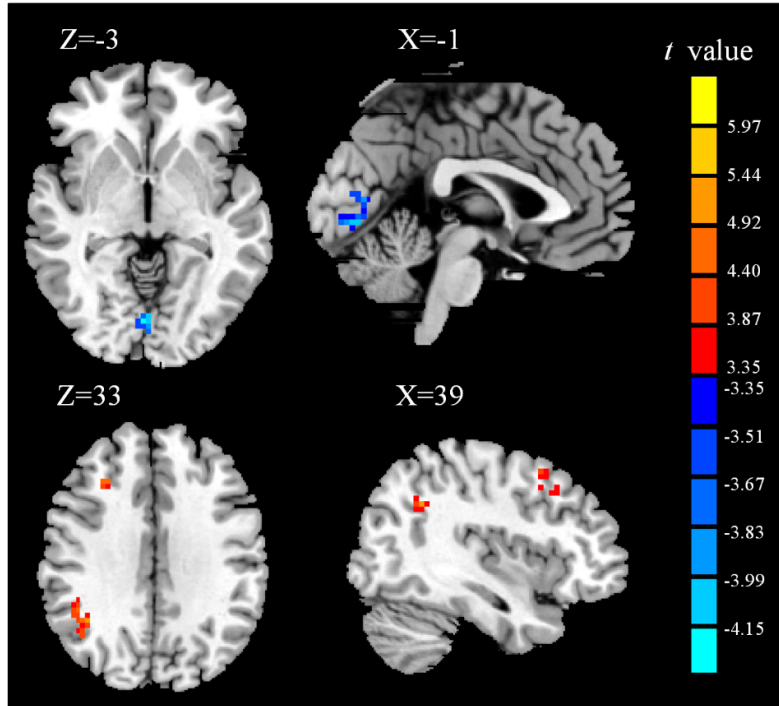

Supplemental Figure S1. Altered CBF/FCS ratios in early POAG patients compared with NC (GRF-corrected voxel  $P$  value  $< 0.001$  and cluster  $P$  value  $< 0.05$ ). The warm and cold colors denote significantly increased and decreased CBF/FCS ratio, respectively, in POAG patients. Abbreviations: CBF, cerebral blood flow; FCS, functional connectivity strength; POAG, primary open-angle glaucoma; NCs, normal controls; GRF, Gaussian random field.

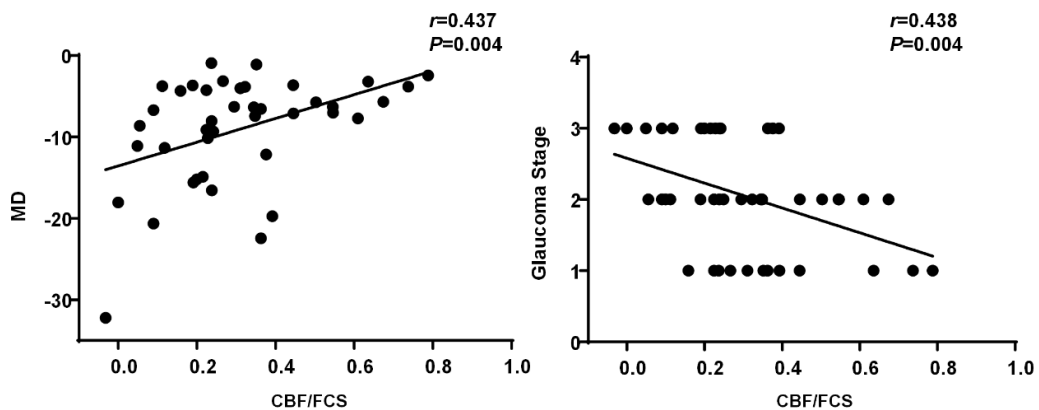

Supplemental Figure S2. Significant correlations between the CBF/FCS ratio of the lingual gyrus and both the MD of visual field defects and glaucoma stage in POAG patients. The scatterplots show that the

CBF/FCS ratio of the lingual gyrus was positively correlated with the MD of visual field defects, and negatively correlated with glaucoma stage. Abbreviations: CBF, cerebral blood flow; FCS, functional connectivity strength; POAG, primary open-angle glaucoma; MD, mean deviation.

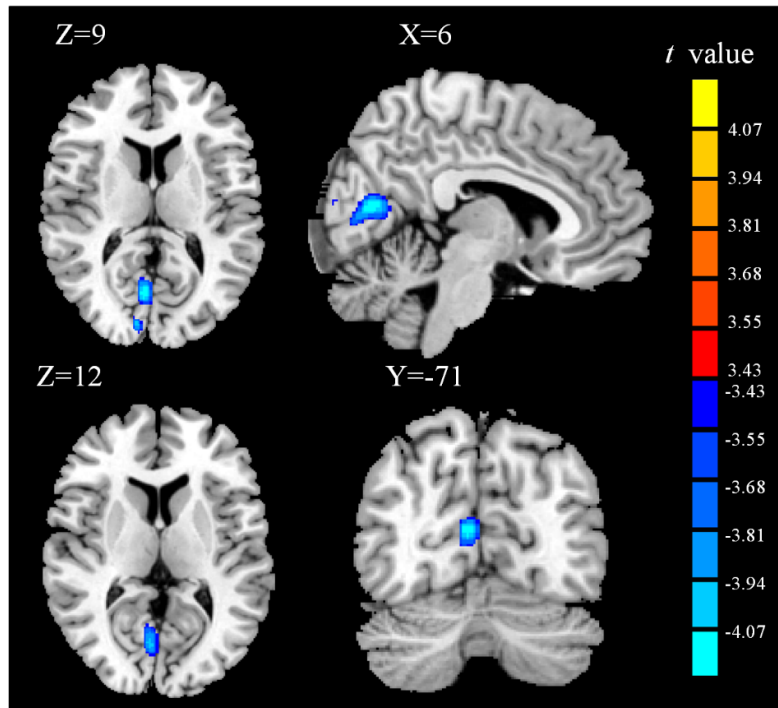

Supplemental Figure S3. Group differences in GMV between POAG patients and NCs. Cool colors show visual cortex atrophy extending to the limbic lobe in patients with POAG compared with NCs ( $P < 0.001$ , uncorrected, cluster size: 552 voxels). Abbreviations: POAG, primary open-angle glaucoma; NCs, normal controls; GMV, gray matter volume.

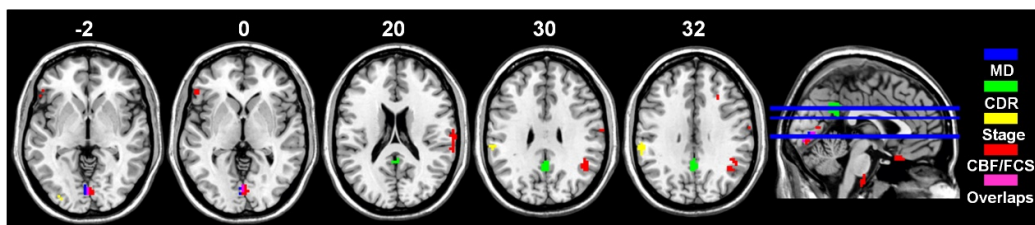

Supplemental Figure S4. The brain regions with abnormal CBF/FCS ratio and regions with the significant correlations between CBF/FCS ratio and MD overlap in the lingual gyrus (pink color), indicating the reduced CBF/FCS ratio in lingual gyrus positively correlated with MD in POAG patients.

The brain regions with abnormal CBF/FCS ratio are showed by red color. The regions with significant correlations between CBF/FCS ratio and three ophthalmologic measures (MD, CDR and glaucoma stage) in patients with POAG are presented by blue, green and yellow color, respectively.

Abbreviations: CBF, cerebral blood flow; FCS, functional connectivity strength; POAG, primary open-angle glaucoma; MD, mean deviation; CDR, cup-to-disc ratio.

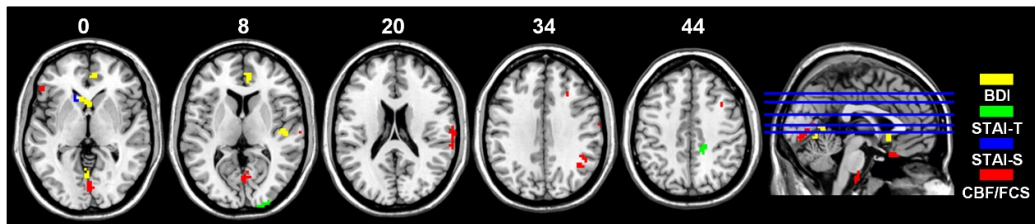

Supplemental Figure S5. The brain regions with abnormal CBF/FCS ratio are showed by red color. The regions with significant correlations between CBF/FCS ratio and three neuropsychological assessments (STAI-S, STAI-T and BDI) in patients with POAG are presented by blue, green and yellow color, respectively. The results showed there was no overlap between brain regions with abnormal CBF/FCS ratio and regions with the significant correlations.

Abbreviations: CBF, cerebral blood flow; FCS, functional connectivity strength; POAG, primary open-angle glaucoma; STAI-S and STAI-T, State-Trait Anxiety Inventory; BDI, Beck Depression Inventory.

**Supplemental Table S1 Brain regions with altered CBF/FCS ratios in early POAG patients compared with NC group**

| Brain regions              | Vox<br>els | MNI coordinates(mm) |     |    | Peak intensity |
|----------------------------|------------|---------------------|-----|----|----------------|
|                            |            | x                   | y   | z  |                |
| Lingual Gyrus              | 33         | 3                   | -81 | -3 | -4.3121        |
| Right angular              | 52         | 39                  | -54 | 33 | 5.3610         |
| Right middle frontal gyrus | 47         | 33                  | 24  | 36 | 6.4886         |

GRF correction voxel  $Z > 3.090232$ , cluster  $P < 0.05$ , cluster size 16 voxels

Abbreviations: FCS, functional connectivity strength; CBF, cerebral blood flow; POAG, primary open angle

glaucoma; NC, normal controls; GRF, Gaussian Random Field Theory.

**Supplemental Table S2. Brain regions with significant differences in CBF/FCS ratio between POAG and NC groups after correction with GMV as covariates**

| Brain regions                 | Voxels | MNI coordinates(mm) |     |     | Peak intensity |
|-------------------------------|--------|---------------------|-----|-----|----------------|
|                               |        | x                   | y   | z   |                |
| <b>POAG &lt; NC</b>           |        |                     |     |     |                |
| Lingual Gyrus                 | 29     | 3                   | -84 | -6  | -4.7699        |
| Rectal Gyrus                  | 46     | 15                  | 18  | -27 | -4.9361        |
| Right inferior temporal gyrus | 25     | 48                  | -42 | -33 | -4.6908        |
| Right superior temporal gyrus | 50     | 66                  | -30 | 15  | -5.1965        |
| <b>POAG &gt; NC</b>           |        |                     |     |     |                |
| Right angular                 | 23     | 39                  | -54 | 33  | 4.2288         |
| Right middle frontal gyrus    | 28     | 30                  | 24  | 36  | 4.5032         |

GRF correction voxel  $Z > 3.090232$ , cluster  $P < 0.05$ , cluster size 18 voxels

Abbreviations: FCS, functional connectivity strength; CBF, cerebral blood flow; GMV, gray matter volume; POAG, primary open angle glaucoma; NC, normal controls; GRF, Gaussian Random Field Theory.

**Supplemental Table S3 Regions showing significant correlations between CBF/FCS ratio and ophthalmologic measures in POAG patients**

| Ophthalmologic measures | Brain regions                 | Voxels | MNI coordinates(mm) |     |    | <i>r</i> -Score for Peak intensity |
|-------------------------|-------------------------------|--------|---------------------|-----|----|------------------------------------|
|                         |                               |        | x                   | y   | z  |                                    |
| MD                      | Lingual Gyrus                 | 32     | 0                   | -78 | 0  | 0.5868                             |
| Glaucoma stage          | Lingual Gyrus                 | 16     | -18                 | -93 | -9 | -0.5720                            |
| Glaucoma stage          | Left supramarginal gyrus      | 27     | -60                 | -33 | 33 | -0.6563                            |
| CDR                     | Cingulate and precuneus gyrus | 51     | 0                   | -54 | 33 | -0.6067                            |

GRF correction voxel  $Z > 3.090232$ , cluster  $P < 0.05$

Abbreviations: CBF, cerebral blood flow; FCS, functional connectivity strength; POAG, primary open-angle glaucoma; MD, mean deviation; CDR, cup-to-disc ratio.

**Supplemental Table S4 Regions showing significant correlations between CBF/FCS ratio and neuropsychological assessments in POAG patients**

| Neuropsychological assessments | Brain regions                | Voxels | MNI coordinates(mm) |     |    | <i>r</i> -Score for Peak intensity |
|--------------------------------|------------------------------|--------|---------------------|-----|----|------------------------------------|
|                                |                              |        | x                   | y   | z  |                                    |
| STAI-T                         | Right middle occipital gyrus | 21     | 24                  | -99 | 12 | 0.6040                             |
| STAI-T                         | Right cingulate gyrus        | 28     | 18                  | -42 | 48 | -0.5559                            |
| STAI-S                         | Left caudate                 | 16     | -15                 | 21  | 0  | 0.6207                             |

|            |                                      |           |           |            |            |               |
|------------|--------------------------------------|-----------|-----------|------------|------------|---------------|
| <b>BDI</b> | <b>Right superior temporal gyrus</b> | <b>23</b> | <b>54</b> | <b>15</b>  | <b>-18</b> | <b>0.5639</b> |
| <b>BDI</b> | <b>Left caudate</b>                  | <b>33</b> | <b>0</b>  | <b>15</b>  | <b>0</b>   | <b>0.6961</b> |
| <b>BDI</b> | <b>Lingual Gyrus</b>                 | <b>23</b> | <b>-3</b> | <b>-66</b> | <b>-3</b>  | <b>0.6174</b> |
| <b>BDI</b> | <b>Right anterior cingulate</b>      | <b>41</b> | <b>9</b>  | <b>48</b>  | <b>0</b>   | <b>0.6438</b> |
| <b>BDI</b> | <b>Right rolandic operculum</b>      | <b>26</b> | <b>45</b> | <b>-18</b> | <b>12</b>  | <b>0.6388</b> |

---

GRF correction voxel  $Z > 3.090232$ , cluster  $P < 0.05$

Abbreviations: CBF, cerebral blood flow; FCS, functional connectivity strength; POAG, primary open-angle glaucoma; STAI-S and STAI-T, State-Trait Anxiety Inventory; BDI, Beck Depression Inventory.
